# Supplementary material for: Simple fabrication of Fe3O4/C/g-C3N4 two-dimensional composite by hydrothermal carbonization approach with enhanced photocatalytic performance under visible light
Source: Royal Society of Chemistry journal article supplement (doi:10.1039/c8cy00698a), 2018-01-01
Supplement: c8cy00698a1.pdf [file c8cy00698a1.pdf]

### Supplementary Information

**Table S1.** Kinetic constants using first-order kinetic model for photocatalytic reduction of Cr (VI) and photocatalytic degradation of dimethoate over different photocatalysts.

|            |                                    | g-C <sub>3</sub> N <sub>4</sub> | C/g-C <sub>3</sub> N <sub>4</sub> | α-Fe <sub>3</sub> O <sub>4</sub> /C/g-C <sub>3</sub> N <sub>4</sub> |
|------------|------------------------------------|---------------------------------|-----------------------------------|---------------------------------------------------------------------|
| Cr(VI)     | $k_{\text{obs}} / \text{min}^{-1}$ | 0.0017                          | 0.0109                            | 0.0355                                                              |
|            | (Adj- $r^2$ )                      | (0.99)                          | (0.99)                            | (0.97)                                                              |
| Dimethoate | $k_{\text{obs}} / \text{min}^{-1}$ | 0.0095                          | 0.0112                            | 0.0203                                                              |
|            | (Adj- $r^2$ )                      | (0.99)                          | (0.99)                            | (0.98)                                                              |

**Table S2.** The values of fitted PL lifetime  $\tau_i$  and corresponding constant  $A_i$  of g-C<sub>3</sub>N<sub>4</sub>, C/g-C<sub>3</sub>N<sub>4</sub>, and Fe<sub>3</sub>O<sub>4</sub>/C/g-C<sub>3</sub>N<sub>4</sub>, respectively.

|                                                                   | $\tau_1 / \text{ns}$<br>( $A_1$ ) | $\tau_2 / \text{ns}$<br>( $A_2$ ) | $\tau_3 / \text{ns}$<br>( $A_3$ ) | $\langle \tau \rangle / \text{ns}$ | $\chi^2$ |
|-------------------------------------------------------------------|-----------------------------------|-----------------------------------|-----------------------------------|------------------------------------|----------|
| g-C <sub>3</sub> N <sub>4</sub>                                   | 1.55<br>(1362.2)                  | 4.91<br>(565.0)                   | 21.57<br>(86.8)                   | 8.48                               | 0.927    |
| C/g-C <sub>3</sub> N <sub>4</sub>                                 | 1.33<br>(1630.1)                  | 4.59<br>(434.0)                   | 18.75<br>(47.36)                  | 5.68                               | 0.902    |
| Fe <sub>3</sub> O <sub>4</sub> /C/g-C <sub>3</sub> N <sub>4</sub> | 1.27<br>(1640.0)                  | 4.08<br>(429.2)                   | 15.53<br>(54.22)                  | 4.89                               | 0.943    |

\*The photoluminescence decays were fit to Eq. (S1) as three exponentials using the PicoQuant software (Fluofit, PicoQuant) so that the lifetimes ( $\tau_i$ ) and the pre-exponential factors ( $A_i$ ) were determined. The value of  $\chi^2$ , as well as visual inspection

of the residuals were used to determine how well the calculated decay fitted the experimental data. Fits were considered acceptable when the  $\chi^2$  value was between 0.9 and 1.1. The intensity-average lifetime of the emission decay is calculated by Eq. (S2).

$$I(t) = I_0 \sum_1^i A_i e^{-t/\tau_i} \quad (\text{S1})$$

$$\langle \tau \rangle = \frac{A_1 \tau_1^2 + A_2 \tau_2^2 + A_3 \tau_3^2}{A_1 \tau_1 + A_2 \tau_2 + A_3 \tau_3} \quad (\text{S2})$$

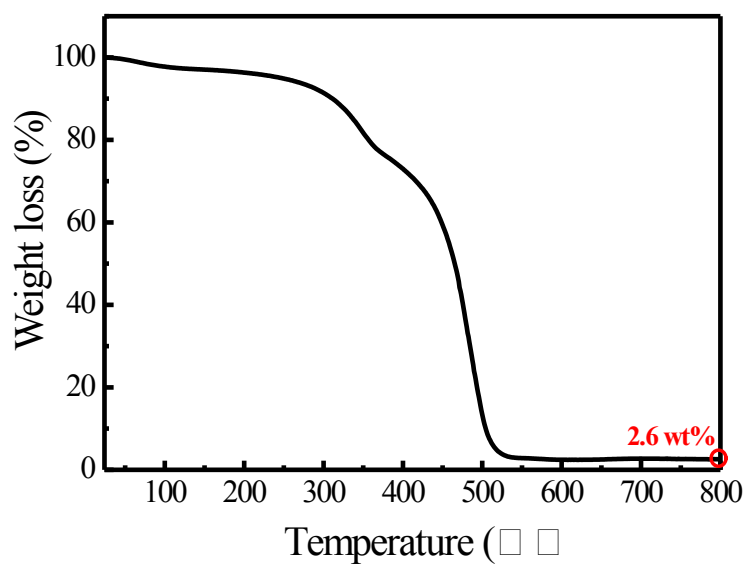

**Figure S1.** Thermogravimetric curve of Fe<sub>3</sub>O<sub>4</sub>/C/g-C<sub>3</sub>N<sub>4</sub>.

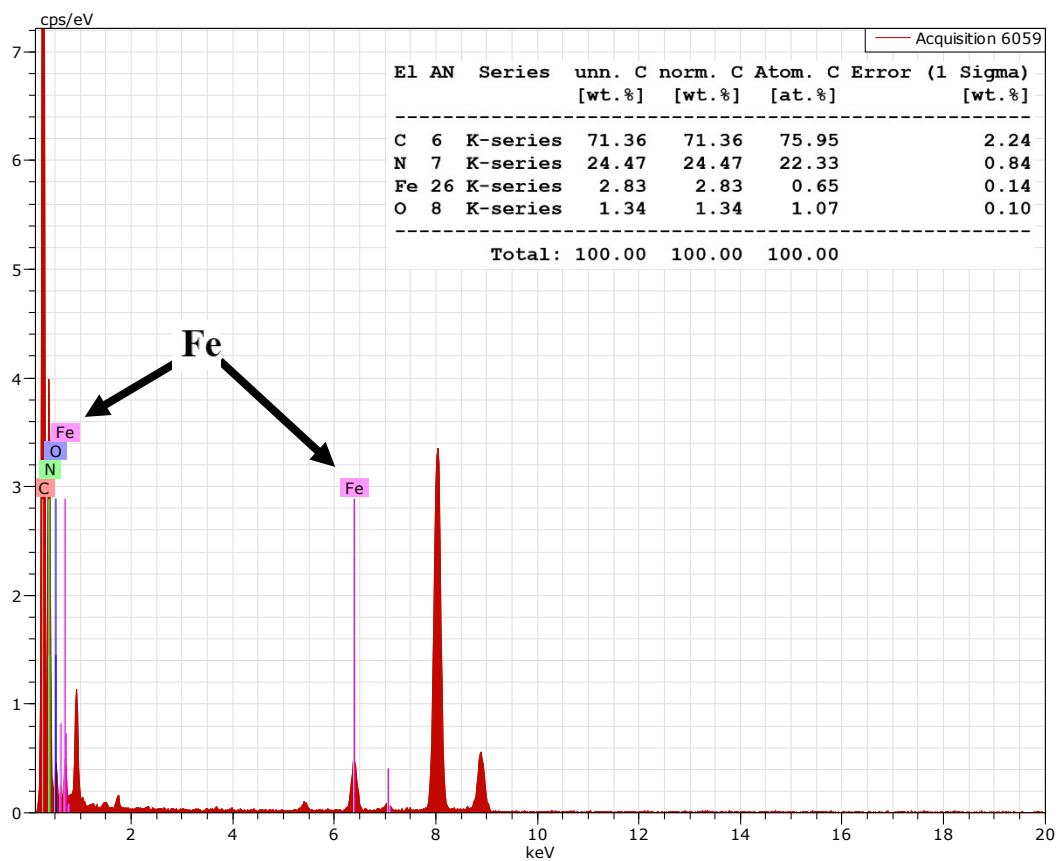

Figure S2. Elemental proportion in  $\alpha$ -Fe<sub>3</sub>O<sub>4</sub>/C/g-C<sub>3</sub>N<sub>4</sub> from EDS elemental analysis.

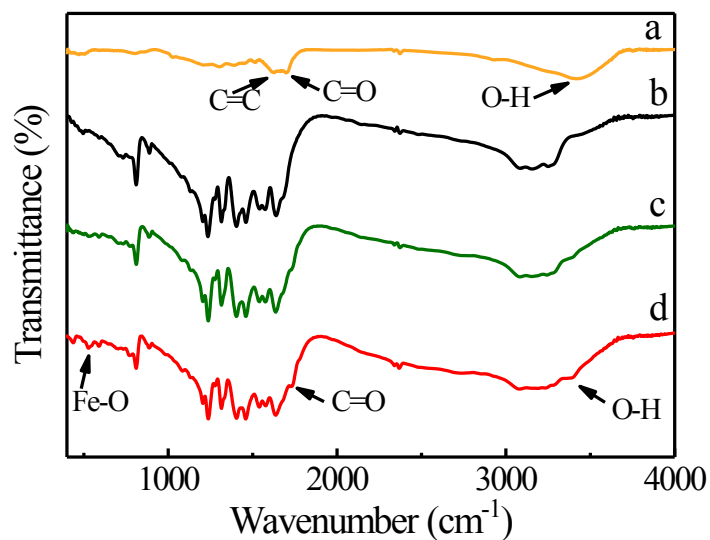

Figure S3. FTIR of carbon (a), g-C<sub>3</sub>N<sub>4</sub> (b), C/g-C<sub>3</sub>N<sub>4</sub> (c) and Fe<sub>3</sub>O<sub>4</sub>/C/g-C<sub>3</sub>N<sub>4</sub> (d).

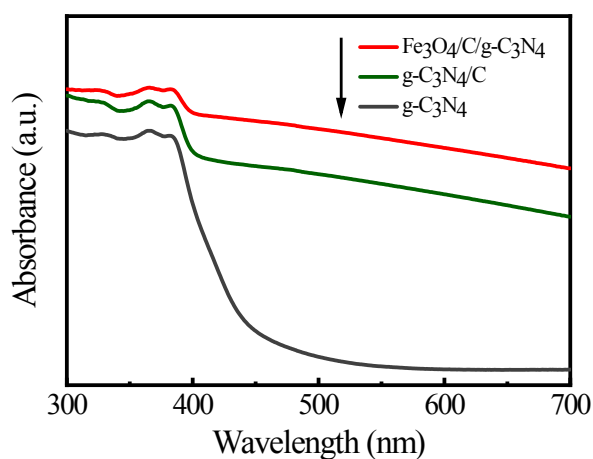

**Figure S4.** UV-vis diffuse reflectance spectra of  $\text{Fe}_3\text{O}_4/\text{C}/\text{g-C}_3\text{N}_4$ ,  $\text{C}/\text{g-C}_3\text{N}_4$ , and  $\text{g-C}_3\text{N}_4$ .

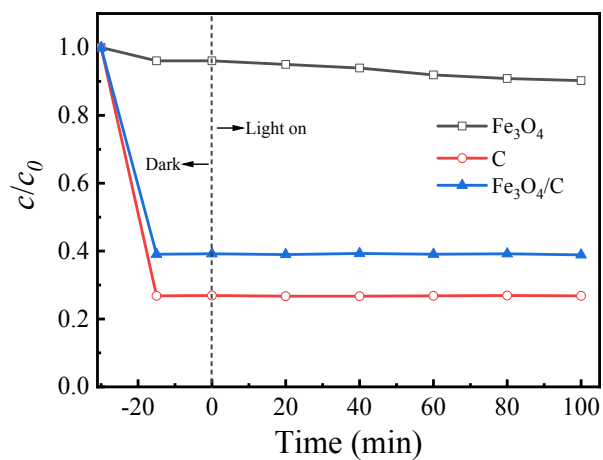

**Figure S5.** Absorption and photoreduction of Cr (VI) (20 mg/L) by  $\text{Fe}_3\text{O}_4$ , carbon, and  $\text{Fe}_3\text{O}_4/\text{C}$  (0.2 g/L) under visible light irradiation ( $\lambda \geq 420 \text{ nm}$ ), respectively.

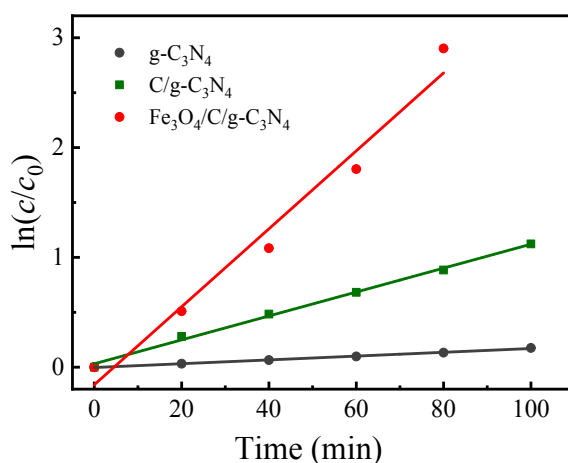

**Figure S6.** Kinetic fit of the photoreduction of Cr (VI) (20 mg/L) by g-C<sub>3</sub>N<sub>4</sub>, C/g-C<sub>3</sub>N<sub>4</sub>, and Fe<sub>3</sub>O<sub>4</sub>/C/g-C<sub>3</sub>N<sub>4</sub> (0.2 g/L), respectively, to the first-order kinetic model under visible light irradiation ( $\lambda \geq 420$  nm).

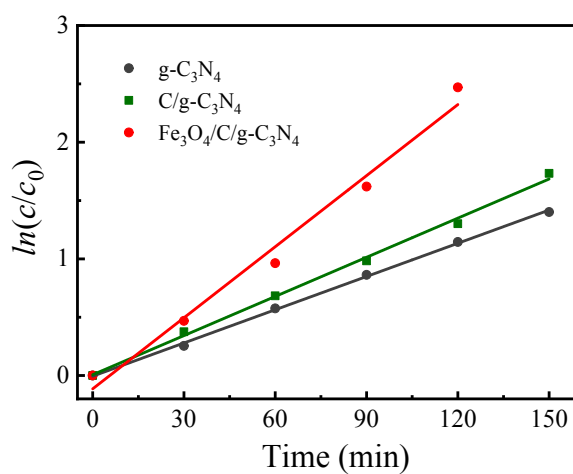

**Figure S7.** Kinetic fit of photodegradation of dimethoate (10 mg/L) by g-C<sub>3</sub>N<sub>4</sub>, C/g-C<sub>3</sub>N<sub>4</sub>, and Fe<sub>3</sub>O<sub>4</sub>/C/g-C<sub>3</sub>N<sub>4</sub> (0.2 g/L) to first-order kinetic model under visible light irradiation ( $\lambda \geq 420$  nm), respectively.

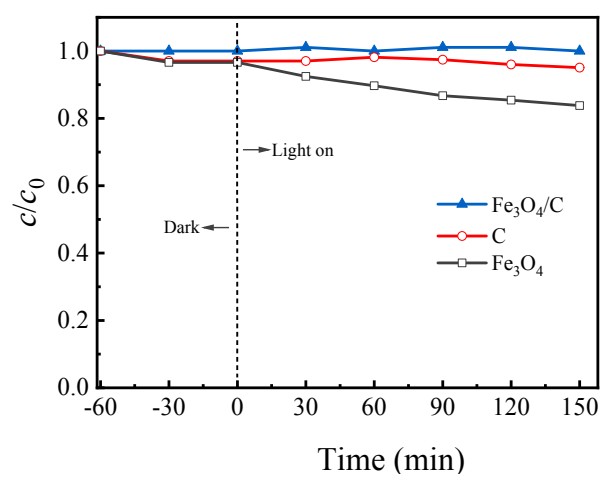

**Figure S8.** Absorption and photodegradation of dimethoate (10 mg/L) by Fe<sub>3</sub>O<sub>4</sub>, carbon, and Fe<sub>3</sub>O<sub>4</sub>/C (0.2 g/L) under visible light irradiation ( $\lambda \geq 420$  nm), respectively.

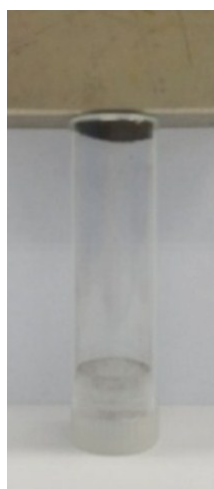

**Figure S9.** The magnetic separation for possessing the Fe<sub>3</sub>O<sub>4</sub> component.

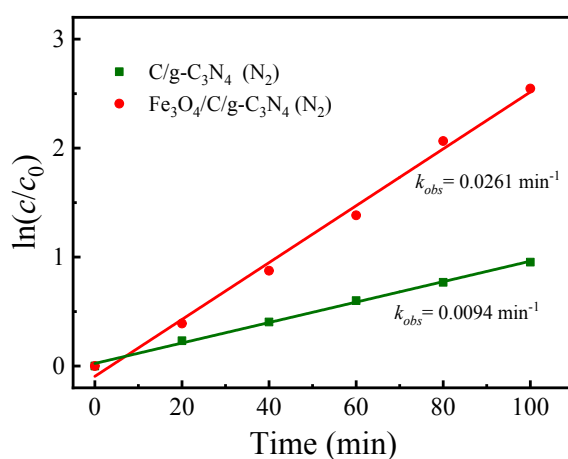

**Figure S10.** Kinetic fit of the photoreduction of Cr(VI) (20 mg/L) by C/g-C<sub>3</sub>N<sub>4</sub> or Fe<sub>3</sub>O<sub>4</sub>/C/g-C<sub>3</sub>N<sub>4</sub> (0.2 g/L) to first-order kinetic mode under the visible light irradiation ( $\lambda \geq 420$  nm) with the continual N<sub>2</sub> purging into the solution.

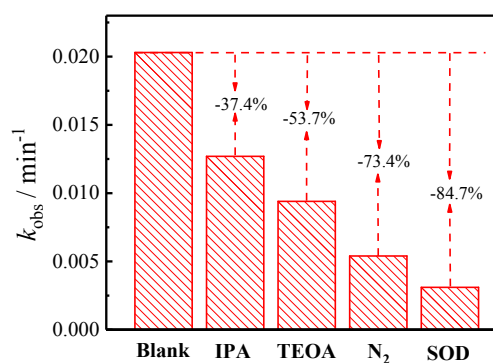

**Figure. S11** Kinetic constants for photocatalytic degradation of dimethoate (10 mg/L) over Fe<sub>3</sub>O<sub>4</sub>/C/g-C<sub>3</sub>N<sub>4</sub> (0.2 g/L) with N<sub>2</sub> continually purged and different scavengers (IPA, 0.01ml; TEOA, 0.01ml; SOD, 1mg) added into the 50ml reaction mixture, respectively.
